# Supplementary material
Source: publisher figshare collection journal article supplement (https://karger.figshare.com/ndownloader/files/35096164)
Supplement: Supplementary file 1 [file 35096164]

**Supplemental Table S4.** *Meta-regression analysis*

| **Nail psoriasis** | **Psoriasis duration** |
| --- | --- |
| Correction of the association between severity of cutaneous psoriasis and PsA for nail psoriasis and psoriasis duration marginally changed our results: of six studies that reported prevalence of nail psoriasis, the crude association showed a mean difference in PASI between PsA and Pso-PsA of 3.5495 (95%CI 1.2606-5.8384; p=0.0024). After correction for difference in nail psoriasis prevalence between PsA and Pso-PsA this effect was 2.7418 (95%CI -1.6255-7.1091; p=0.2185)(effect nail psoriasis: 0.0366 (95%CI -0.1157-0.189; p=0.6375)). | Of eight studies that described psoriasis duration, the crude association showed a PASI mean difference of 1.2471 (95%CI -0.0694-2.5636; p=0.0634). The effect after correction for psoriasis duration was 0.8397 (95%CI -0.6912-2.3706; p=0.2823)(effect psoriasis duration: 0.1957 (95%CI -0.2184-0.6098; p=0.3543). Even though the results of mean difference PASI were no longer statistically significant, possibly due to the low number of patients, this suggests that our results are not (fully) explained by confounding by psoriasis duration. |

**Abbreviations**: CI: confidence interval; PASI: psoriasis area and severity index; PsA: psoriatic arthritis; Pso-PsA: psoriasis without psoriatic arthritis.
